# Supplementary material for: A hierarchical porous P-doped carbon electrode through hydrothermal carbonization of pomelo valves for high-performance supercapacitors
Source: Royal Society of Chemistry journal article supplement (doi:10.1039/d0na00211a), 2020-01-01
Supplement: d0na00211a1.pdf [file d0na00211a1.pdf]

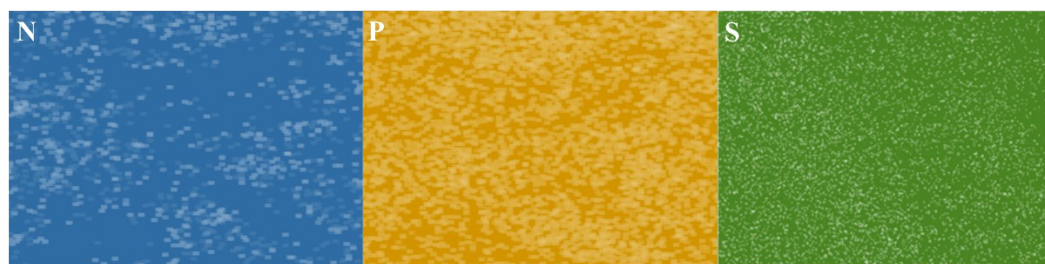

Fig. S1 Elemental mapping images of N, P and S.

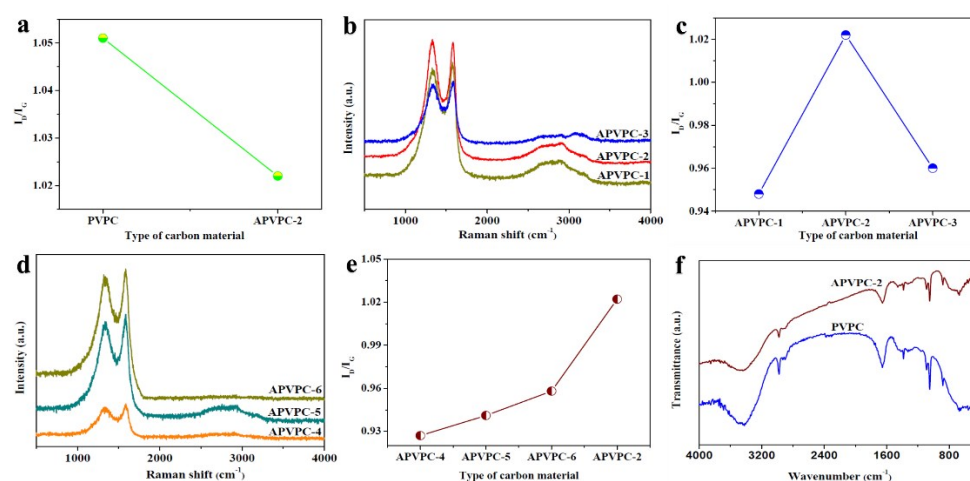

**Fig. S2** (a) Ratio of integrated intensities of  $I_D/I_G$  for PVPC and APVPC-2. (b) Raman spectrum of APVPC-1, APVPC-2 and APVPC-3. (c) Ratio of integrated intensities of  $I_D/I_G$  for APVPC-1, APVPC-2 and APVPC-3. (d) Raman spectrum of APVPC-4, APVPC-5 and APVPC-6. (e) Ratio of integrated intensities of  $I_D/I_G$  for APVPC-4, APVPC-5, APVPC-6 and APVPC-2. (f) FT-IR spectra of PVPC and APVPC-2.

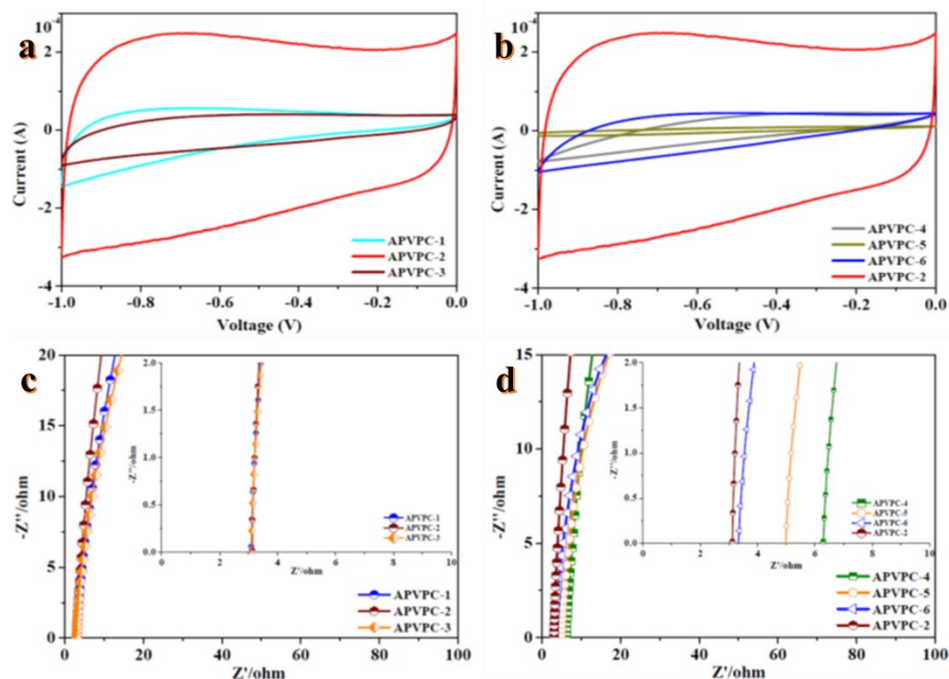

**Fig. S3** (a) CV curves of APVPC samples prepared under different reaction times at  $100 \text{ mV s}^{-1}$ . (b) CV curves of APVPC samples prepared under different concentration of  $\text{H}_3\text{PO}_4$  at  $100 \text{ mV s}^{-1}$ . (c) Nyquist plots of APVPC samples prepared under different reaction times. (d) Nyquist plots of APVPC samples prepared under different concentration of  $\text{H}_3\text{PO}_4$ .

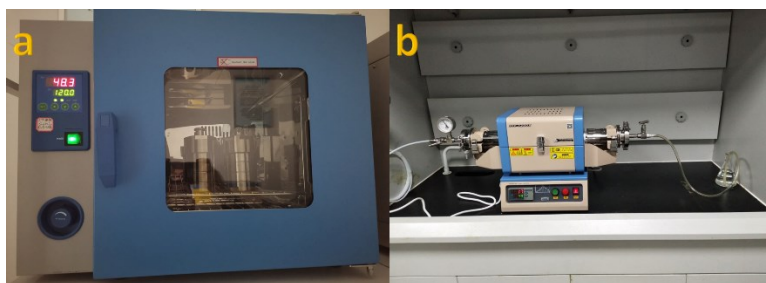

**Fig. S4** (a) Electric blast drying oven (DGG-9053A). (b) Tube furnace (OTF-1200X).
